# Supplementary material
Source: Springer Nature journal article supplement (https://www.springermedizin.de/resource/supplementary/12943_2014_1376_MOESM4_ESM.pdf/9552842)

**Flk1****c-Kit****CD45****CD31****A**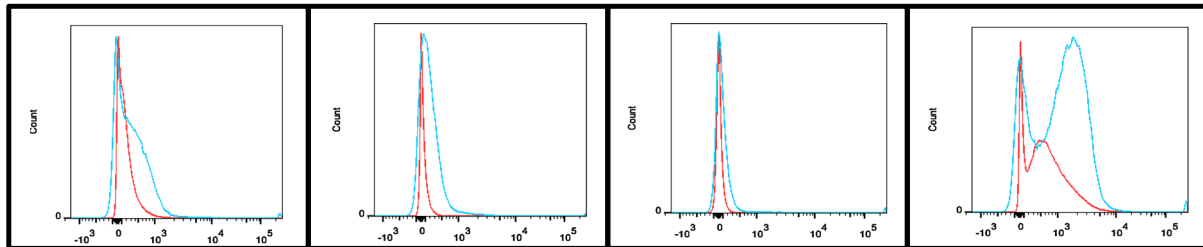**B**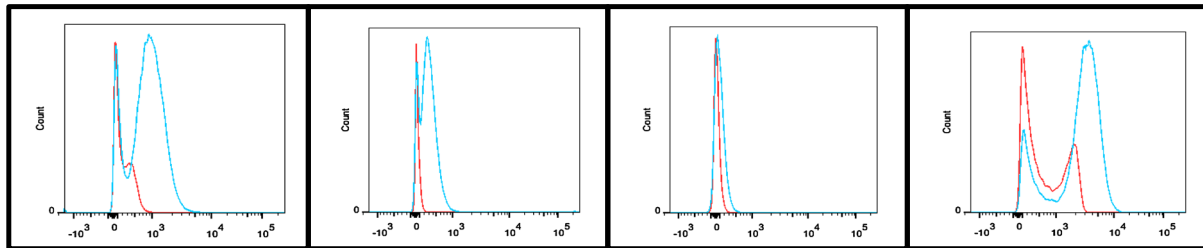**C**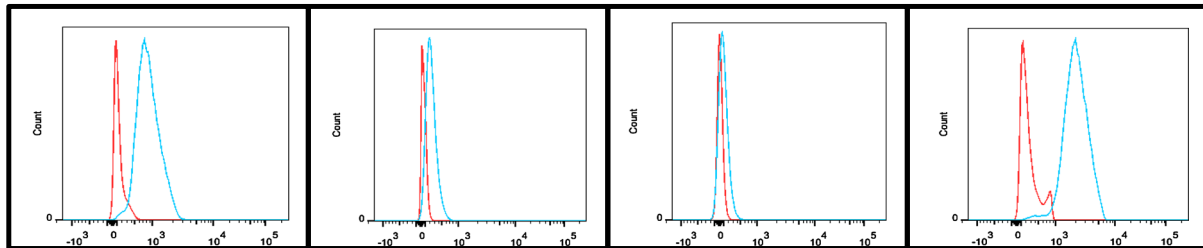

Supplement: MOESM4 [file 9552842]
